# Supplementary material for: miR-548e Sponged by ZFAS1 Regulates Metastasis and Cisplatin Resistance of OC by Targeting CXCR4 and let-7a/BCL-XL/S Signaling Axis
Source: PubMed Central journal article supplement — Mol Ther Nucleic Acids. 2020 Apr 7;20:621–38. doi: 10.1016/j.omtn.2020.03.013 (PMC7191130; doi:10.1016/j.omtn.2020.03.013), 2020-04-07
Supplement: mmc1.pdf [file mmc1.pdf]

**Supplemental Information**

**miR-548e Sponged by ZFAS1 Regulates Metastasis  
and Cisplatin Resistance of OC by Targeting  
CXCR4 and let-7a/BCL-XL/S Signaling Axis**

**Jing Zhang, Li-Ni Quan, Qiu Meng, Hai-Yan Wang, Jie Wang, Pin Yu, Jian-Tao Fu, Ying-Jia Li, Jin Chen, Hong Cheng, Qing-Ping Wu, Xin-Rong Yu, Hong-Ye Yun, and Shou-Guo Huang**

## Supplemental Figure S1:

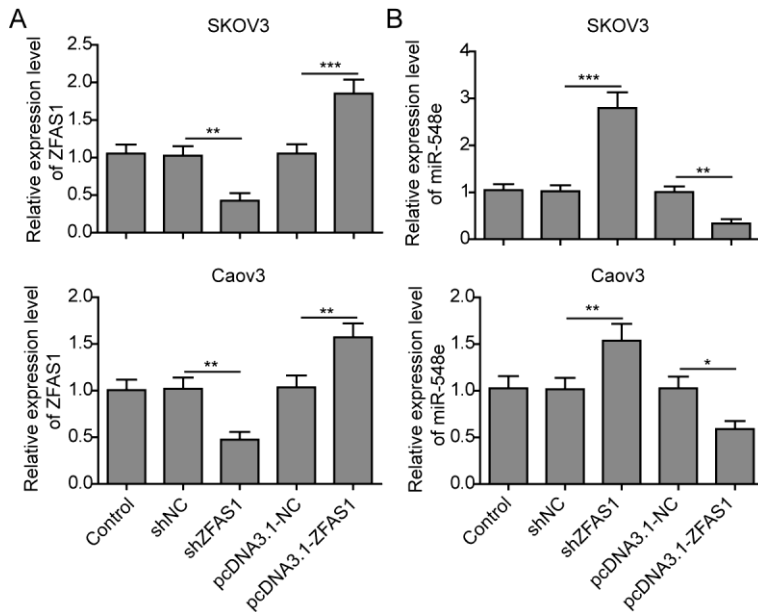

### Supplemental Figure S1. Alterations of ZFAS1 and miR-548e expression in SKOV3 and Caov3 cells by shZFAS1 and ZFAS1 over-expressing vector.

(A) Silencing and overexpression of ZFAS1 in SKOV3 and Caov3 cells by transfection with shZFAS1 or pcDNA3.1-ZFAS1 plasmids. ZFAS1 expression was measured by qRT-PCR. (B) Expression of miR-548e in SKOV3 and Caov3 cells with silenced or elevated ZFAS1 expression. ZFAS1: Zinc finger antisense 1; NC: negative control; shZFAS1: short hairpin RNA targeting ZFAS1; \*  $P < 0.05$ , \*\*  $P < 0.01$  and \*\*\*  $P < 0.001$ .

**Supplemental Figure S2:**

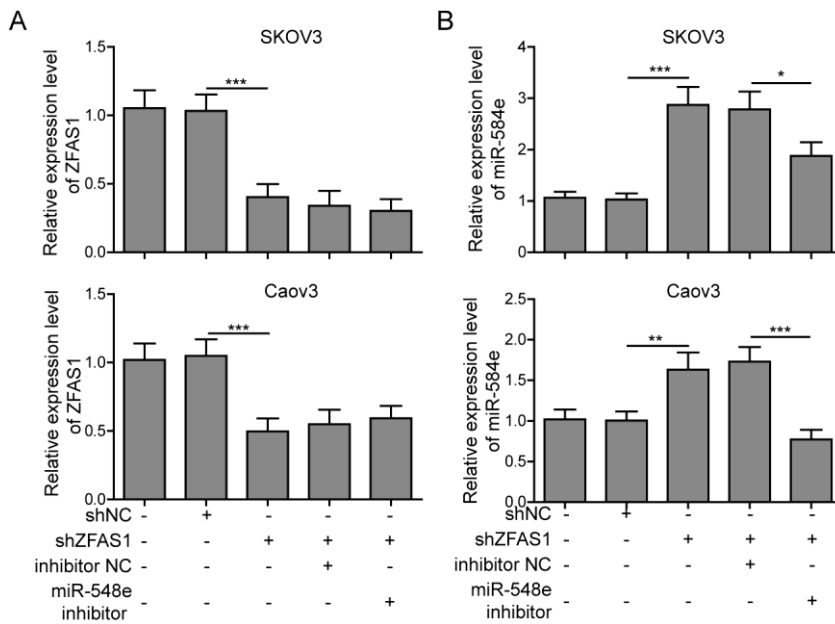

**Supplemental Figure S2. Alterations of ZFAS1 and miR-548e expression in SKOV3 and Caov3 cells by shZFAS1 and miR-548e inhibitor.**

(A) ZFAS1 relative expression levels in SKOV3 and Caov3 cells transfected with shZFAS1 and miR-548e inhibitor. ZFAS1 expression was evaluated by qRT-PCR. (B) miR-548e relative expression levels in SKOV3 and Caov3 cells transfected with shZFAS1 and miR-548e inhibitor. ZFAS1: Zinc finger antisense 1; shZFAS1: short hairpin RNA targeting ZFAS1; NC: negative control; \*  $P < 0.05$ , \*\*  $P < 0.01$  and \*\*\*  $P < 0.001$ .

**Supplemental Figure S3:**

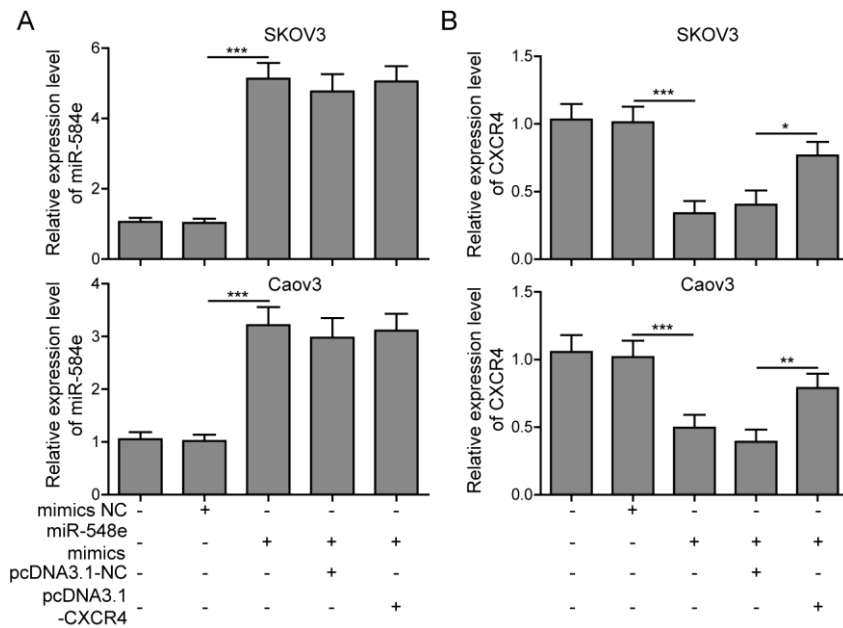

**Supplemental Figure S3. Changes of miR-548e and CXCR4 expression in SKOV3 and Caov3 cells induced by miR-548e mimics and CXCR4 over-expressing vector.**

(A) miR-548e expression levels in SKOV3 and Caov3 cells transfected with miR-548e mimics and CXCR4 over-expressing plasmids. qRT-PCR was performed to detect miR-548e expression. (B) CXCR4 expression levels in SKOV3 and Caov3 cells transfected with miR-548e mimics and CXCR4 over-expressing plasmids by qRT-PCR. NC: negative control; CXCR4: Chemokine receptor 4; \*  $P < 0.05$ , \*\*  $P < 0.01$  and \*\*\*  $P < 0.001$ .
